# Supplementary material
Source: PubMed Central journal article supplement (PMC4298209)
Supplement: rspb20142192supp1.pdf [file rspb20142192supp1.pdf]

## Supplementary table legends

**Table S1.** Primers used for nested PCR. The first reaction used primers F1-R2 and the second (nested) reaction used F2-R1.

**Table S2.** Functionality of genes examined in this study. Genes are reported as “Functional”, “Pseudogene”, “no BLAST results”, “no PCR results”, “Functional?” or “Pseudogene?” “Functional?” refers to sequences that do not demonstrate evidence of inactivation, but other lines of evidence suggest that they are pseudogenes (e.g., gene inactivation timing estimates). “Pseudogene?” denotes sequences that have putative inactivating mutations but other lines of evidence make these designations uncertain. Specifically, 1) *PDE6B* in *Choloepus hoffmanni* has a frameshift deletion, but this is near the 3’ end of this long gene and all other rod genes are functional in this species, and 2) *Myiodon darwini*’s *PDE6H* has a splice acceptor mutation shared with *C. hoffmanni*, but no other inactivating mutations were found. If reported as a pseudogene, the putative inactivating mutations were tabulated: SA = splice acceptor mutation; SD: splice donor mutation; INS = frameshift insertion; DEL = frameshift deletion; STOP = premature stop codon; Other = other putative inactivating mutations; Reference = previous study that determined gene functionality. Numbers correspond to the location of the mutations in dataset S1.

**Table S3.** Putative inactivating mutations shared by species of various clades represented in our study. Euphractinae = *Euphractus*, *Chaetophractus*, *Zaedyus*; Tolypeutinae = *Priodontes*, *Tolypeutes*; Myrmecophagidae = *Myrmecophaga*, *Tamandua*. Mutation types

same as table S2. Position of mutation corresponds to the location of the mutations in dataset S1.

**Table S4.** Results from pseudogene dating calculations using dataset S2. Stem Xenarthra, *Dasypus*, *Choloepus* and *Manis* indicate the branch on which we assumed the gene was inactivated based on shared or unique inactivation mutations (table S3). CF 1, CF 2 and CF 3 correspond to codon models one, two and three in PAML respectively. mb age = mixed branch age (from [2]); mb  $\omega$  = mixed branch  $\omega$ ; fb  $\omega$  = functional branch  $\omega$ ; p  $\omega$  = pseudogene branch  $\omega$ ; date 1 = pseudogenization date, one synonymous substitution rate assumption; date 2 = pseudogenization date, two synonymous substitution rates assumption (see [3] for details); average = average of all six dating estimates. The pseudogene branch  $\omega$  was assumed to be 1 whenever a pseudogene branch category was not available. The stem Xenarthra estimate was added to Meredith et al.'s [2] average estimate for the crown Xenarthra divergence (65.43 Ma). In cases where the mixed branch  $\omega$  exceeded the pseudogene branch  $\omega$ , we set the inactivation date estimate at the earliest age of the mixed branch (e.g., *Dasypus LWS* and *GUCY2F*).

**Table S5.** Comparison of *SWSI* inactivation dates across Mammalia. Lineage refers to the branch that we assume *SWSI* was inactivated on. "Various" indicates multiple lineages within a clade that lost *SWSI* independently. Inactivation Date refers to inactivation dates in millions of years based on point estimates (Xenarthra, *Manis pentadactyla*, Chrysochloridae, *Spalax ehrenbergi*) and ranges derived from phylogenetic bracketing. Ranges derived from divergence time estimates [1,3,4]

**Table S6.** Accession numbers for all new gene sequences reported in this study. All sequences for *Myiodon darwinii* were downloaded from the NCBI Sequence Read Archive. Several *de novo* sequences were too short (<200 bp) to be submitted to GenBank, but can be found in dataset S1.

### Supplemental references

1. Meredith RW, Janečka JE, Gatesy J, Ryder OA, Fisher CA, Teeling EC, Goodbla A, Eizirik E, Simão TLL, Stadler T et al. 2011 Impacts of the Cretaceous Terrestrial Revolution and KPg extinction on mammal diversification. *Science* **334**, 521–524. (doi:10.1126/science.1211028)
2. Meredith RW, Gatesy J, Murphy WJ, Ryder OA, Springer MS. 2009 Molecular decay of the tooth gene Enamelin (*ENAM*) mirrors the loss of enamel in the fossil record of placental mammals. *PLoS Genet.* **5**, e1000634. (doi:10.1371/journal.pgen.1000634)
3. Springer MS, Meredith, RW, Gatesy J, Emerling CA, Park J, Rabosky DL, Stadler T, Steiner C, Ryder OA, Janečka JE et al. 2012 Macroevolutionary dynamics and historical biogeography of primate diversification inferred from a species supermatrix. *PLoS One* **7**, e49521. (doi:10.1371/journal.pone.0049521)
4. Fabre P, Hautier L, Dimitrov D, Douzery EJP. 2012 A glimpse on the pattern of rodent diversification: a phylogenetic approach. *BMC Evol. Biol.* **12**, 88. (doi:10.1186/1471-2148-12-88)

5. Müller B, Goodman SM, Peichl L. 2007 Cone photoreceptor diversity in the retinas of fruit bats (Megachiroptera). *Brain. Behav. Evol.* **70**, 90–104. (doi:10.1159/000102971)
6. Zhao H, Rossiter SJ, Teeling EC, Li C, Cotton JA, Zhang S. 2009 The evolution of color vision in nocturnal mammals. *Proc. Natl. Acad. Sci. U. S. A.* **106**, 8980–8985. (doi:10.1073/pnas.0813201106)
7. Tan Y, Yoder AD, Yamashita N, Li W-H. 2005 Evidence from opsin genes rejects nocturnality in ancestral primates. *Proc. Natl. Acad. Sci. U. S. A.* **102**, 14712–14716. (doi:10.1073/pnas.0507042102)
8. Ahnelt PK, Moutairou K, Glösmann M, Kübber-Heiss A. 2003 Lack of S-opsin expression in the brush-tailed porcupine (*Atherurus africanus*) and other mammals. Is the Evolutionary Persistence of S-cones a Paradox. In *Normal and Defective Colour Vision* (eds. Mollon JD, Pokorny J, Knoblauch K), pp. 31–38. Oxford University Press.
9. Peichl L, Behrmann G, Kröger RH. 2001 For whales and seals the ocean is not blue: a visual pigment loss in marine mammals. *Eur. J. Neurosci.* **13**, 1520–1528. (doi:10.1046/j.0953-816x.2001.01533.x)
10. Levenson DH, Ponganis PJ, Crognale MA, Deegan JF, Dizon A, Jacobs GH. 2006 Visual pigments of marine carnivores: pinnipeds, polar bear, and sea otter. *J. Comp. Physiol. A. Neuroethol. Sens. Neural. Behav. Physiol.* **192**, 833–43. (doi:10.1007/s00359-006-0121-x)

11. Veilleux CC, Louis EE, Bolnick DA. 2013 Nocturnal light environments influence color vision and signatures of selection on the *OPN1SW* opsin gene in nocturnal lemurs. *Mol. Biol. Evol.* **30**, 1420–1437. (doi:10.1093/molbev/mst058)
12. Meredith RW, Gatesy J, Emerling CA, York VM, Springer MS. 2013 Rod monochromacy and the coevolution of cetacean retinal opsins. *PLoS Genet.* **9**, e1003432. (doi:10.1371/journal.pgen.1003432)
13. Jacobs GH, Deegan JF. 1992 Cone photopigments in nocturnal and diurnal procyonids. *J. Comp. Physiol. A.* **171**, 351–358.
14. Jacobs G, Williams G. 2010 Cone pigments in a North American marsupial, the opossum (*Didelphis virginiana*). *J. Comp. Physiol. A* **196**, 379–384. (doi:10.1007/s00359-010-0519-3)
15. Carvalho LDS, Cowing JA, Wilkie SE, Bowmaker JK, Hunt DM. 2006 Shortwave visual sensitivity in tree and flying squirrels reflects changes in lifestyle. *Curr. Biol.* **16**, R81–3. (doi:10.1016/j.cub.2006.01.045)
16. Calderone JB, Jacobs GH. 1999 Cone receptor variations and their functional consequences in two species of hamster. *Vis. Neurosci.* **16**, 53–63.
17. Williams GA, Jacobs GH. 2008 Absence of functional short-wavelength sensitive cone pigments in hamsters (*Mesocricetus*). *J. Comp. Physiol. A. Neuroethol. Sens. Neural. Behav. Physiol.* **194**, 429–39. (doi:10.1007/s00359-008-0316-4)
18. Levenson DH, Fernandez-Duque E, Evans S, Jacobs GH. 2007 Mutational changes in S-cone opsin genes common to both nocturnal and cathemeral *Aotus* monkeys. *Am. J. Primatol.* **69**, 757–765. (doi:10.1002/ajp)

19. Peichl L, Moutairou K. 1998 Absence of short-wavelength sensitive cones in the retinae of seals (Carnivora) and African giant rats (Rodentia). *Eur. J. Neurosci.* **10**, 2586–2594.
20. Szél A, Csorba G, Caffé AR, Szél G. 1994 Different patterns of retinal cone topography in two genera of rodents, *Mus* and *Apodemus*. *Cell Tissue Res.* **276**, 143–150.
21. Szél A, Röhlich P, Caffé AR, van Veen T. 1996 Distribution of cone photoreceptors in the mammalian retina. *Microsc. Res. Tech.* **35**, 445–462.  
(doi:10.1002/(SICI)1097-0029(19961215)35:6<445::AID-JEMT4>3.0.CO;2-H)
22. Emerling CA, Springer MS. 2014 Eyes underground: Regression of visual protein networks in subterranean mammals. *Mol. Phylogenet. Evol.* **78C**, 260–270.  
(doi:10.1016/j.ympcv.2014.05.016)

**Table S1**

|               |                                       |
|---------------|---------------------------------------|
| <b>SWS1</b>   |                                       |
| <b>exon 1</b> |                                       |
| F1            | CTTGGGKAMTTCTAATTCCAAACTYTGTC         |
| R2            | CCAACAGCCCAGTWCCTRGTTCCAAATCTGG       |
|               |                                       |
| F2            | GTGGCTTTGGAGGAGGRCYTCTGTGKGGG         |
| R1            | GTTCCAAATCTGGAGCMGYGTWCTTTGCCTC       |
|               |                                       |
| <b>exon 2</b> |                                       |
| F1            | GCAGCCCAGACCAGAAGTCTGACCCAAATAGG      |
| R2            | CTCTTSCYACACCCAGTCAACCTAAGCTCCTSGC    |
|               |                                       |
| F2            | CATCCTTTTTTCCACTCTGCCTGCCAGGCTGG      |
| R1            | CCTRAGCTCCTSGCTGAGTYAGCACCCTG         |
|               |                                       |
| <b>exon 3</b> |                                       |
| F1            | CTCCYTTCCYCCAGTCKTTTGGCATTGAG         |
| R2            | GGYACATGTRTCTCTTGACATTCAGAATC         |
|               |                                       |
| F2            | GTCKTTTGGCATTGAGTTCYCAACWGAGAACAC     |
| R1            | CAGAGCACTMACCCAYTYCTCCCACCTAGAG       |
|               |                                       |
| <b>exon 4</b> |                                       |
| F1            | GAGATCTGAGTTATGGGCCAGAGAGAAGAGG       |
| R2            | GTGGTAGACGGACGCCCTAACCACTGGGCC        |
|               |                                       |
| F2            | GGGCCAGAGAGAAGAGGGACATGGTGG           |
| R1            | CCACTGGGCCAAGTCCGCTTCTCTAGAG          |
|               |                                       |
| <b>exon 5</b> |                                       |
| F1            | CCTGGTGTTCTCTCTTCTGCATTAGTCTGCC       |
| R2            | GTGGCCTTTGGGGTGGTCAAGTAGTCCAAGCTG     |
|               |                                       |
| F2            | GCATTAGTCTGCCAAGAGGGCTATCTCCAG        |
| R1            | CCAAGCTGGGAATAGTAGCTTGTGGGCAG         |
|               |                                       |
| <b>PDE6C</b>  |                                       |
| <b>exon 4</b> |                                       |
| F1            | GAATAGATACWTGTTCAAAAATAGAAYTG         |
| R2            | GCAAAGCCAAMATTCAAGYCTAGATCTTTTTGYTC   |
|               |                                       |
| F2            | CWTGTTCAAAAATAGAATTGAATTAAGAMTGSC     |
| R1            |                                       |
| Cingulata     | GATCTTTTTGYTCTRAAATATATACTTTTTGCMTCTG |
| R1 Pilosa     | GATCTTTTTGYTCTRAAATGCACACTTTTTGCMTCTG |
|               |                                       |

|               |                                 |
|---------------|---------------------------------|
| <b>exon 5</b> |                                 |
| F1            | GSTCCTTTCTAGCTCYRAAATTCCAG      |
| R2            | GGTCCCACAGARAGTTWCAGWACTAGAACCC |
|               |                                 |
| F2            | CCAGAATTACATAAATTARMATRAAATGTGC |
| R1            | GTTWCAGWACTAGAACCCAGGYCTCCC     |

Table S2

|              | <i>Dasypus</i>                           | <i>Choloepus hoffmanni</i> | <i>Myiodon</i>    |  |
|--------------|------------------------------------------|----------------------------|-------------------|--|
| <b>ARR3</b>  | <b>No BLAST results</b>                  | <b>No BLAST results</b>    |                   |  |
| <b>CNGA1</b> | Functional                               | Functional                 |                   |  |
| <b>CNGA3</b> | Functional                               | Functional                 |                   |  |
| <b>CNGB1</b> | Functional                               | Functional                 |                   |  |
| <b>CNGB3</b> | <b>Pseudogene</b>                        | Functional                 |                   |  |
| SD           | 650                                      |                            |                   |  |
| INS          | 1873, 1990                               |                            |                   |  |
| DEL          | 1291                                     |                            |                   |  |
| STOP         | 763-5, 1330-2,<br>1450-2, 2134-6         |                            |                   |  |
|              |                                          |                            |                   |  |
| <b>GNAT1</b> | Functional                               | Functional                 |                   |  |
| <b>GNAT2</b> | <b>Pseudogene</b>                        | Functional                 |                   |  |
| SD           | 163, 887                                 |                            |                   |  |
| SA           | 117                                      |                            |                   |  |
| INS          | 388-9, 478-9,<br>838, 850                |                            |                   |  |
| DEL          | 327-33, 396                              |                            |                   |  |
| STOP         | 298-300, 949-51,<br>1051-3               |                            |                   |  |
| Other        | Partial exon-intron<br>deletion: 723-732 |                            |                   |  |
|              |                                          |                            |                   |  |
| <b>GNB1</b>  | Functional                               | Functional                 |                   |  |
| <b>GNB3</b>  | Functional                               | Functional                 |                   |  |
| <b>GNGT1</b> | Functional                               | Functional                 |                   |  |
| <b>GNGT2</b> | Functional                               | <b>Pseudogene</b>          |                   |  |
| INS          |                                          | 183-660                    |                   |  |
|              |                                          |                            |                   |  |
| <b>GRK1</b>  | Functional                               | Functional                 |                   |  |
| <b>GRK7</b>  | <b>Pseudogene</b>                        | <b>Pseudogene</b>          | <b>Pseudogene</b> |  |
| SD           | 1060, 1338                               |                            |                   |  |



|               |                                                                                                                                      |                                                                                           |                                        |  |
|---------------|--------------------------------------------------------------------------------------------------------------------------------------|-------------------------------------------------------------------------------------------|----------------------------------------|--|
| INS           | 937, 1495-9                                                                                                                          | 1255, 1589-1629                                                                           | 1255, 1589-1619                        |  |
| DEL           | 548-9, 1537                                                                                                                          | 1301-2                                                                                    |                                        |  |
| STOP          | 478-80, 718-20, 1294-6, 1363-5                                                                                                       | 1207-9, 1315-7, 1534-6, 612-4                                                             | 612-4                                  |  |
| Other         | Repetitive element insertion: 1-463<br>Partial exon-intron deletion: 947-1179                                                        | Partial exon-intron deletion: 947-1179                                                    | Partial exon-intron deletion: 947-1179 |  |
|               |                                                                                                                                      |                                                                                           |                                        |  |
| <b>GUCA1A</b> | Functional                                                                                                                           | Functional                                                                                |                                        |  |
| <b>GUCA1B</b> | <b>Pseudogene</b>                                                                                                                    | Functional                                                                                |                                        |  |
| DEL           | 267-428, 558-9, 563, 568                                                                                                             |                                                                                           |                                        |  |
|               |                                                                                                                                      |                                                                                           |                                        |  |
| <b>GUCY2D</b> | Functional                                                                                                                           | Functional                                                                                |                                        |  |
| <b>GUCY2F</b> | <b>Pseudogene</b>                                                                                                                    | <b>Pseudogene</b>                                                                         | <b>Pseudogene</b>                      |  |
| SD            | 2291                                                                                                                                 | 1585, 2291, 3172                                                                          |                                        |  |
| SA            |                                                                                                                                      | 2439                                                                                      |                                        |  |
| INS           | 496, 819-4572, 883, 2772                                                                                                             | 1318, 1351-4, 2839-40                                                                     |                                        |  |
| DEL           | 237, 306-39, 472-3, 682-98, 915, 955, 1321, 1346, 1410, 1661, 1902, 2031, 2123-38, 2567-8, 3069                                      | 163, 253-9, 882, 1324, 2724-805                                                           | 253-9, 2724-805                        |  |
| STOP          | 394-6, 613-615, 703-5, 796-8, 1144-6, 1162-4, 1198-1200, 1363-5, 1387-9, 1528-30, 1612-4, 1630-2, 2149-51, 2170-2, 2440-2, 2929-2931 | 181-3, 229-31, 829-31, 1372-4, 1396-8, 1759-61, 1897-9, 2410-2, 3055-7, 3118-3120, 3151-3 | 181-3                                  |  |
|               |                                                                                                                                      |                                                                                           |                                        |  |
| <b>LWS</b>    | <b>Pseudogene</b>                                                                                                                    | Functional                                                                                |                                        |  |
| SA            | 983                                                                                                                                  |                                                                                           |                                        |  |
| DEL           | 119-25, 144-65, 303, 532, 884, 1007, 1051                                                                                            |                                                                                           |                                        |  |
| STOP          | 244-6                                                                                                                                |                                                                                           |                                        |  |
|               |                                                                                                                                      |                                                                                           |                                        |  |
| <b>PDE6A</b>  | Functional                                                                                                                           | Functional                                                                                |                                        |  |

|              |                                                                                                    |                                                           |                                      |  |
|--------------|----------------------------------------------------------------------------------------------------|-----------------------------------------------------------|--------------------------------------|--|
| <b>PDE6B</b> | Functional                                                                                         | <b>Pseudogene?</b>                                        |                                      |  |
| DEL          |                                                                                                    | 2491-2                                                    |                                      |  |
|              |                                                                                                    |                                                           |                                      |  |
| <b>PDE6C</b> | <b>Pseudogene</b>                                                                                  | <b>Pseudogene</b>                                         | <b>Pseudogene</b>                    |  |
| SD           | 724, 868, 946,<br>1011, 2320                                                                       | 1126                                                      | 1126                                 |  |
| SA           | 632, 723, 1418                                                                                     | 1418, 1743                                                |                                      |  |
| INS          | 67-8, 727, 1933-<br>40, 2161-5, 2194,<br>2200, 2545-8                                              | 919-20, 1851-8                                            |                                      |  |
| DEL          | 271, 392, 805-8,<br>843, 1356-60,<br>1480, 1488,<br>1632-3, 1702-9,<br>2003-4, 2223,<br>2376, 2447 | 278-91, 338, 479-94,<br>1279-82, 1414-7,<br>1630, 1954    | 479-94, 560,<br>1954                 |  |
| STOP         | 289-91, 829-31,<br>943-5, 961-3,<br>1585-7                                                         | 814-6, 829-31, 943-5                                      | 814-6, 829-<br>31, 1111-3,<br>1915-7 |  |
|              |                                                                                                    |                                                           |                                      |  |
| <b>PDE6G</b> | Functional                                                                                         | Functional                                                |                                      |  |
| <b>PDE6H</b> | <b>Pseudogene</b>                                                                                  | <b>Pseudogene</b>                                         | <b>Pseudogene?</b>                   |  |
| SD           |                                                                                                    | 136, 176                                                  |                                      |  |
| SA           | 134                                                                                                | 133                                                       | 133                                  |  |
| DEL          | 160, 232-5                                                                                         |                                                           |                                      |  |
| STOP         |                                                                                                    | 235-7                                                     |                                      |  |
| Other        |                                                                                                    | Start codon mutation:<br>1-3                              |                                      |  |
|              |                                                                                                    |                                                           |                                      |  |
| <b>RH1</b>   | Functional                                                                                         | Functional                                                |                                      |  |
| <b>SAG</b>   | Functional                                                                                         | Functional                                                |                                      |  |
| <b>SWS1</b>  | <b>Pseudogene</b>                                                                                  | <b>Pseudogene</b>                                         | <b>Pseudogene</b>                    |  |
| SD           | 731, 970                                                                                           |                                                           |                                      |  |
| INS          | 247-57, 580-1,<br>685-686                                                                          | 43-6, 398                                                 | 398                                  |  |
| DEL          | 33-4, 320-1, 340,<br>345, 645, 692,<br>823-36, 848-76,<br>922                                      | 98-9, 139-40, 340-3,<br>613, 681-2, 1067-8                | 139-40                               |  |
| STOP         | 82-4, 208-10,<br>313-5, 391-3,<br>445-7, 532-4                                                     | 70-2, 316-8, 505-7,<br>700-2, 973-5                       | 505-7                                |  |
| Other        | Pro23Leu: 67-9                                                                                     | Pro23Leu: 67-9<br>Partial exon-intron<br>deletion: 550-91 |                                      |  |

|                |                       |                   |                               |                   |
|----------------|-----------------------|-------------------|-------------------------------|-------------------|
| <b>SLC24A2</b> | Functional            | Functional        |                               |                   |
|                |                       |                   |                               |                   |
|                | <b>Balaenoptera</b>   | <b>Physeter</b>   | <b>Manis</b>                  | <b>Tursiops</b>   |
| <b>CNGA3</b>   | Functional            | <b>Pseudogene</b> | Functional                    | Functional        |
| SD             |                       | 738               |                               |                   |
| SA             |                       |                   | 451-2                         |                   |
| INS            |                       | 1171, 1936        |                               |                   |
| STOP           |                       | 469-471           |                               |                   |
|                |                       |                   |                               |                   |
| <b>CNGB3</b>   | <b>Pseudogene</b>     | <b>Pseudogene</b> | Functional                    | Functional        |
| SA             | 1183                  |                   |                               |                   |
| DEL            |                       | 554, 1407         |                               |                   |
| STOP           | 1525-7                |                   |                               |                   |
|                |                       |                   |                               |                   |
| <b>GNAT2</b>   | Functional            | <b>Pseudogene</b> | Functional                    | Functional        |
| SA             | 726                   |                   |                               |                   |
| INS            |                       | 1012              |                               |                   |
|                |                       |                   |                               |                   |
| <b>GNB3</b>    | Functional            | Functional        |                               | Functional        |
| <b>GNGT2</b>   | Functional            | <b>Pseudogene</b> | Functional                    | Functional        |
| STOP           |                       | 115-7             |                               |                   |
|                |                       |                   |                               |                   |
| <b>LWS</b>     | <b>Pseudogene</b>     | <b>Pseudogene</b> | Functional                    | Functional        |
| Reference      | [12]                  | [12]              |                               |                   |
|                |                       |                   |                               |                   |
| <b>PDE6C</b>   | Functional            | Functional        | Functional                    | Functional        |
| <b>PDE6H</b>   | <b>Pseudogene</b>     | Functional        | Functional                    | Functional        |
| STOP           | 235-7                 |                   |                               |                   |
|                |                       |                   |                               |                   |
| <b>SWS1</b>    | <b>Pseudogene</b>     | <b>Pseudogene</b> | <b>Pseudogene</b>             | <b>Pseudogene</b> |
| INS            |                       |                   | 1042                          |                   |
| DEL            |                       |                   | 613, 694-712,<br>1002-3, 1049 |                   |
| Reference      | [12]                  | [12]              |                               | [12]              |
|                |                       |                   |                               |                   |
|                | <b>Chaetophractus</b> | <b>Euphractus</b> | <b>Priodontes</b>             | <b>Tolypeutes</b> |
| <b>PDE6C</b>   | <b>Pseudogene</b>     | <b>Pseudogene</b> | <b>Pseudogene</b>             | <b>Pseudogene</b> |
| SD             |                       |                   | 868                           | 868               |
| SA             |                       |                   |                               | 866               |
| DEL            | 763-4, 805-8,         | 763-4, 805-8      | 780-3                         |                   |
| STOP           |                       |                   |                               | 883-5             |
|                |                       |                   |                               |                   |

|              |                                  |                                                        |                              |                                             |
|--------------|----------------------------------|--------------------------------------------------------|------------------------------|---------------------------------------------|
| <b>SWS1</b>  | <b>Pseudogene</b>                | <b>Pseudogene</b>                                      | <b>Pseudogene</b>            | <b>Pseudogene</b>                           |
| SD           |                                  | 731                                                    |                              | 731                                         |
| INS          |                                  |                                                        | 1006                         | 115-6, 418                                  |
| DEL          | 33-4, 320-1, 340-1, 359          | 33-4, 263, 320-1, 340-1, 359                           | 33-4, 284-5, 320-1, 340-1    | 31-4, 320-1, 340-1                          |
| STOP         | 208-10, 391-3                    | 208-10, 391-3                                          | 208-10                       | 208-10, 391-3                               |
| Other        | Pro23Leu: 67-9                   | Pro23Leu: 67-9                                         | Pro23Leu: 67-9               | Pro23Leu: 67-9; Start codon mutation: 10-12 |
|              |                                  |                                                        |                              |                                             |
|              | <b>Zaedyus</b>                   | <b>Choloepus didactylus</b>                            | <b>Bradypus</b>              |                                             |
| <b>PDE6C</b> | Functional?                      | <b>Pseudogene</b>                                      | <b>Pseudogene</b>            |                                             |
| SA           |                                  |                                                        | 723                          |                                             |
| INS          |                                  | 919-20                                                 | 919-20                       |                                             |
| STOP         |                                  | 814-6, 829-31, 943-5                                   | 814-6, 829-31                |                                             |
|              |                                  |                                                        |                              |                                             |
| <b>SWS1</b>  | <b>Pseudogene</b>                | <b>Pseudogene</b>                                      | <b>Pseudogene</b>            |                                             |
| SD           | 731                              |                                                        |                              |                                             |
| INS          |                                  | 43-6, 398                                              | 43-6, 398                    |                                             |
| DEL          | 33-4, 199-200, 320-1, 340-1, 359 | 98-9, 139-40, 340-3, 417, 613, 681-2                   | 98-9, 139-40, 199-200, 340-3 |                                             |
| STOP         | 208-10                           | 70-2, 316-8, 505-7, 700-2                              | 40-2, 70-2, 316-8, 505-7     |                                             |
| Other        | Pro23Leu: 67-9                   | Pro23Leu: 67-9<br>Partial exon-intron deletion: 550-91 | Pro23Leu: 67-9               |                                             |
|              |                                  |                                                        |                              |                                             |
|              | <b>Myrmecophaga</b>              | <b>Tamandua</b>                                        | <b>Cyclopes</b>              |                                             |
| <b>PDE6C</b> | Functional?                      | No PCR results                                         | Functional?                  |                                             |
| <b>SWS1</b>  | <b>Pseudogene</b>                | <b>Pseudogene</b>                                      | No PCR results               |                                             |
| INS          | 556, 983                         | 556                                                    |                              |                                             |
| DEL          | 654, 700-24, 1073                | 654, 700-24                                            |                              |                                             |

**Table S3**

| <b>Clade</b>              | <b>Gene</b>   | <b>Mutation</b>                     | <b>Position</b> |
|---------------------------|---------------|-------------------------------------|-----------------|
| Xenarthra                 | <i>GRK7</i>   | DEL                                 | 947-1179        |
| Folivora                  | <i>GRK7</i>   | INS                                 | 1255            |
| Folivora                  | <i>GRK7</i>   | INS                                 | 1589-629        |
| Folivora                  | <i>GUCY2F</i> | STOP                                | 181-3           |
| Folivora                  | <i>GUCY2F</i> | DEL                                 | 253-9           |
| Folivora                  | <i>GUCY2F</i> | DEL                                 | 2724-805        |
| Euphractinae              | <i>PDE6C</i>  | DEL                                 | 763-4           |
| Euphractinae              | <i>PDE6C</i>  | DEL                                 | 805-8           |
| Tolypeutinae              | <i>PDE6C</i>  | SD                                  | 868             |
| Folivora                  | <i>PDE6C</i>  | DEL                                 | 479-94          |
| Folivora                  | <i>PDE6C</i>  | STOP                                | 814-6           |
| Folivora                  | <i>PDE6C</i>  | STOP                                | 829-31          |
| Folivora                  | <i>PDE6C</i>  | INS                                 | 919-20          |
| Folivora                  | <i>PDE6C</i>  | DEL                                 | 1954            |
| <i>Choloepus</i>          | <i>PDE6C</i>  | STOP                                | 943-5           |
| Folivora                  | <i>PDE6H</i>  | SA                                  | 133             |
| Xenarthra                 | <i>SWS1</i>   | missense<br>P23L                    | 67-9            |
| Cingulata                 | <i>SWS1</i>   | DEL                                 | 33-4            |
| Cingulata                 | <i>SWS1</i>   | STOP                                | 208-10          |
| Cingulata                 | <i>SWS1</i>   | DEL                                 | 320-1           |
| Cingulata                 | <i>SWS1</i>   | STOP                                | 391-3           |
| Cingulata                 | <i>SWS1</i>   | STOP                                | 700-2           |
| Cingulata                 | <i>SWS1</i>   | SD                                  | 731             |
| Euphractinae+Tolypeutinae | <i>SWS1</i>   | DEL                                 | 340-1           |
| Euphractinae              | <i>SWS1</i>   | DEL                                 | 359             |
| Folivora                  | <i>SWS1</i>   | INS                                 | 43-6            |
| Folivora                  | <i>SWS1</i>   | STOP                                | 70-2            |
| Folivora                  | <i>SWS1</i>   | DEL                                 | 98-9            |
| Folivora                  | <i>SWS1</i>   | DEL                                 | 139-40          |
| Folivora                  | <i>SWS1</i>   | STOP                                | 316-8           |
| Folivora                  | <i>SWS1</i>   | DEL                                 | 340-3           |
| Folivora                  | <i>SWS1</i>   | INS                                 | 398             |
| Folivora                  | <i>SWS1</i>   | STOP                                | 505-7           |
| <i>Choloepus</i>          | <i>SWS1</i>   | partial exon-<br>intron<br>deletion | 550-591         |
| <i>Choloepus</i>          | <i>SWS1</i>   | DEL                                 | 613             |
| <i>Choloepus</i>          | <i>SWS1</i>   | DEL                                 | 681-2           |
| Myrmecophagidae           | <i>SWS1</i>   | INS                                 | 556             |
| Myrmecophagidae           | <i>SWS1</i>   | DEL                                 | 654             |
| Myrmecophagidae           | <i>SWS1</i>   | DEL                                 | 700-24          |



|                  |               |                               |                               |                              |               |               |                |
|------------------|---------------|-------------------------------|-------------------------------|------------------------------|---------------|---------------|----------------|
| <b>PDE6H</b>     |               |                               |                               |                              |               |               |                |
| CF 1             |               | 1.6689                        | 0.0752                        |                              | 65.43         | 65.43         | 65.43          |
| CF 2             |               | 1.8902                        | 0.0721                        |                              | 65.43         | 65.43         |                |
| CF 3             |               | 3.278                         | 0.0957                        |                              | 65.43         | 65.43         |                |
|                  |               |                               |                               |                              |               |               |                |
|                  | <b>mb age</b> | <b>mb <math>\omega</math></b> | <b>fb <math>\omega</math></b> | <b>p <math>\omega</math></b> | <b>date 1</b> | <b>date 2</b> | <b>average</b> |
| <b>Choloepus</b> | 65.43         |                               |                               |                              |               |               |                |
| <b>GNGT2</b>     |               |                               |                               |                              |               |               |                |
| CF 1             |               | 0.7316                        | 0.1886                        |                              | 43.79         | 38.35         | 38.56          |
| CF 2             |               | 0.7034                        | 0.138                         |                              | 42.92         | 37.4          |                |
| CF 3             |               | 0.6297                        | 0.1376                        |                              | 37.34         | 31.53         |                |
|                  |               |                               |                               |                              |               |               |                |
| <b>GUCY2F</b>    |               |                               |                               |                              |               |               |                |
| CF 1             |               | 0.8563                        | 0.1851                        |                              | 53.89         | 50.11         | 51.22          |
| CF 2             |               | 0.8484                        | 0.185                         |                              | 53.26         | 49.33         |                |
| CF 3             |               | 0.8362                        | 0.1767                        |                              | 52.41         | 48.29         |                |
|                  |               |                               |                               |                              |               |               |                |
| <b>PDE6C</b>     |               |                               |                               |                              |               |               |                |
| CF 1             |               | 0.9972                        | 0.1266                        |                              | 65.22         | 65.13         | 65.35          |
| CF 2             |               | 1.072                         | 0.1316                        |                              | 65.43         | 65.43         |                |
| CF 3             |               | 1.0001                        | 0.1222                        |                              | 65.43         | 65.43         |                |
|                  |               |                               |                               |                              |               |               |                |
| <b>PDE6H</b>     |               |                               |                               |                              |               |               |                |
| CF 1             |               | 0.6567                        | 0.0752                        |                              | 41.14         | 35.49         | 38.63          |
| CF 2             |               | 0.6238                        | 0.0721                        |                              | 38.9          | 33.14         |                |
| CF 3             |               | 0.7073                        | 0.0957                        |                              | 44.25         | 38.86         |                |
|                  |               |                               |                               |                              |               |               |                |
|                  | <b>mb age</b> | <b>mb <math>\omega</math></b> | <b>fb <math>\omega</math></b> | <b>p <math>\omega</math></b> | <b>date 1</b> | <b>date 2</b> | <b>average</b> |
| <b>Manis</b>     | 82            |                               |                               |                              |               |               |                |
| <b>SWS1</b>      |               |                               |                               |                              |               |               |                |
| CF 1             |               | 0.8208                        | 0.1602                        | 0.9677                       | 67.08         | 62.23         | 60.48          |
| CF 2             |               | 0.6487                        | 0.1209                        | 0.8161                       | 62.25         | 56.43         |                |
| CF 3             |               | 0.6307                        | 0.1102                        | 0.8157                       | 60.5          | 54.39         |                |

**Table S5**

| <b>Lineage</b>              | <b>Inactivation Date (Ma)</b> | <b>Reference</b> |
|-----------------------------|-------------------------------|------------------|
| Xenarthra                   | 80.06                         | This study       |
| Various Pteropodidae        | <62.92                        | [1,5,6]          |
| <i>Manis pentadactyla</i>   | 60.48                         | This study       |
| Lorisiformes                | 54.23-34.74                   | [3,7]            |
| <i>Atherurus africanus</i>  | <49.03                        | [1,8]            |
| Rhinolophidae               | <42.24                        | [1,6]            |
| Hipposideridae              | <42.24                        | [1,6]            |
| Pinnipedia                  | 38.95-21.34                   | [1,9,10]         |
| <i>Phaner</i> spp.          | <30.65                        | [1,11]           |
| Odontoceti                  | 29.36-25.19                   | [1,12]           |
| Mysticeti                   | 29.36-17.77                   | [1,12]           |
| Various Procyonidae         | <28.8                         | [1,13]           |
| <i>Didelphis virginiana</i> | <22.87                        | [1,14]           |
| Pteromyinae                 | 20.56-16.13                   | [4,15]           |
| <i>Mesocricetus</i> spp.    | 20.15-5.53                    | [4,16,17]        |
| <i>Aotus</i> spp.           | 19.73-3.31                    | [3,18]           |
| <i>Cricetomys</i> spp.      | 19.62-0.795                   | [4,19]           |
| Various Muridae             | <18.33                        | [4,20,21]        |
| Chrysochloridae             | 15.84                         | [22]             |
| <i>Spalax ehrenbergei</i>   | 4.98                          | [22]             |

**Table S6**

|                            | <b>CNGA1</b>                                                                                 | <b>CNGA3</b>                 | <b>CNGB1</b>                                                 |                              |
|----------------------------|----------------------------------------------------------------------------------------------|------------------------------|--------------------------------------------------------------|------------------------------|
| <b><i>Dasybus</i></b>      | PreEnsembl77                                                                                 | AAGV03048495<br>AAGV03048497 | PreEnsembl77                                                 |                              |
| <b><i>Choloepus</i></b>    | ABVD02324799<br>ABVD02324800                                                                 | ABVD02209073<br>ABVD02209074 | ABVD02313158<br>ABVD02313159<br>ABVD02313160<br>ABVD02313161 |                              |
| <b><i>Manis</i></b>        |                                                                                              | JPTV01040328                 |                                                              |                              |
| <b><i>Balaenoptera</i></b> |                                                                                              | ATDI01097026                 |                                                              |                              |
| <b><i>Physter</i></b>      |                                                                                              | AWZP01040480<br>AWZP01040481 |                                                              |                              |
| <b><i>Tursiops</i></b>     |                                                                                              | Ensembl77                    |                                                              |                              |
|                            |                                                                                              |                              |                                                              |                              |
|                            | <b>CNGB3</b>                                                                                 | <b>GNAT1</b>                 | <b>GNAT2</b>                                                 | <b>GNB1</b>                  |
| <b><i>Dasybus</i></b>      | AAGV03211124<br>AAGV03211126<br>AAGV03211127<br>AAGV03211128<br>AAGV03211129<br>AAGV03211130 | PreEnsembl77                 | PreEnsembl77<br>AAGV03021203                                 | PreEnsembl77<br>AAGV03047165 |



|                     |                                                                                                                              |                              |                              |                                              |
|---------------------|------------------------------------------------------------------------------------------------------------------------------|------------------------------|------------------------------|----------------------------------------------|
| <b>Choloepus</b>    | ABVD02023726<br>ABVD02284123<br>ABVD02284124<br>ABVD02285446<br>ABVD02285447<br>ABVD02313196                                 | ABVD02276772                 | ABVD02295506                 | ABVD02283083<br>ABVD02283084                 |
| <b>Manis</b>        | JPTV01084724<br>JPTV01048282<br>JPTV01048283<br>JPTV01048285<br>JPTV01048287<br>JPTV01104307<br>JPTV01156557                 |                              | JPTV01016472                 |                                              |
| <b>Balaenoptera</b> | ATDI01074324<br>ATDI01074325<br>ATDI01074327<br>ATDI01074328<br>ATDI01074329<br>ATDI01074330<br>ATDI01074334<br>ATDI01074335 |                              | ATDI01126518                 |                                              |
| <b>Physeter</b>     | AWZP01071271<br>AWZP01071272<br>AWZP01070593<br>AWZP01070594<br>AWZP01070595                                                 |                              | AWZP01019448<br>AWZP01019449 |                                              |
| <b>Tursiops</b>     | Ensembl77<br>ABRN02336514<br>ABRN02336517<br>ABRN02336518                                                                    |                              | Ensembl77                    |                                              |
|                     |                                                                                                                              |                              |                              |                                              |
|                     | <b>GNB3</b>                                                                                                                  | <b>GNGT1</b>                 | <b>GNGT2</b>                 | <b>GRK1</b>                                  |
| <b>Dasypus</b>      | AAGV03018811                                                                                                                 | PreEnsembl77                 | AAGV03072014                 | PreEnsembl77                                 |
| <b>Choloepus</b>    | ABVD02276487                                                                                                                 | ABVD02262436                 | ABVD02305635                 | ABVD02324237<br>ABVD02324238                 |
| <b>Manis</b>        | JPTV01014604                                                                                                                 |                              | JPTV01081741                 |                                              |
| <b>Balaenoptera</b> | ATDI01107455                                                                                                                 |                              | ATDI01043175                 |                                              |
| <b>Physeter</b>     | AWZP01024304                                                                                                                 |                              | AWZP01027662                 |                                              |
| <b>Tursiops</b>     | Ensembl77<br>ABRN02026850                                                                                                    |                              | Ensembl77                    |                                              |
|                     |                                                                                                                              |                              |                              |                                              |
|                     | <b>GRK7</b>                                                                                                                  | <b>GUCA1A</b>                | <b>GUCA1B</b>                | <b>GUCY2D</b>                                |
| <b>Dasypus</b>      | AAGV03101898<br>AAGV03101900                                                                                                 | PreEnsembl77                 | AAGV03123970                 | AAGV03093596<br>AAGV03093597<br>AAGV03093598 |
| <b>Choloepus</b>    | ABVD02351822<br>ABVD02351823                                                                                                 | ABVD02358812<br>ABVD02358813 | ABVD02358812                 | ABVD02338829                                 |
|                     |                                                                                                                              |                              |                              |                                              |
|                     | <b>GUCY2F</b>                                                                                                                | <b>LWS</b>                   | <b>PDE6A</b>                 | <b>PDE6B</b>                                 |

|                                    |                                                                                                                                              |                              |                     |                                              |
|------------------------------------|----------------------------------------------------------------------------------------------------------------------------------------------|------------------------------|---------------------|----------------------------------------------|
| <b><i>Dasybus</i></b>              | AAGV03190987<br>AAGV03190992<br>AAGV03190993<br>AAGV03190994<br>AAGV03190999<br>AAGV03191001<br>AAGV03191002<br>AAGV03191003<br>AAGV03191006 | AAGV03294213<br>AAGV03294214 | PreEnsembl77        | PreEnsembl77<br>AAGV03252435<br>AAGV03252438 |
| <b><i>Choloepus</i></b>            | ABVD02035242<br>ABVD02035244<br>ABVD02097780<br>ABVD02260638<br>ABVD02260639<br>ABVD02298362                                                 | ABVD02349172<br>ABVD02349173 | ABVD02099621        | ABVD02334313<br>ABVD02334319<br>ABVD02334320 |
| <b><i>Manis</i></b>                |                                                                                                                                              | JPTV01114000                 |                     |                                              |
|                                    |                                                                                                                                              |                              |                     |                                              |
|                                    | <b><i>PDE6C</i></b>                                                                                                                          | <b><i>PDE6G</i></b>          | <b><i>PDE6H</i></b> | <b><i>RH1</i></b>                            |
| <b><i>Dasybus</i></b>              | AAGV03030957<br>AAGV03030958<br>AAGV03030959<br>AAGV03030961<br>AAGV03030962<br>AAGV03030963<br>KP096706                                     | AAGV03151984                 | AAGV03107798        | AAGV03234874                                 |
| <b><i>Chaeophractus</i></b>        | KP096707                                                                                                                                     |                              |                     |                                              |
| <b><i>Euphractus</i></b>           | KP096708                                                                                                                                     |                              |                     |                                              |
| <b><i>Priodontes</i></b>           | KP096709                                                                                                                                     |                              |                     |                                              |
| <b><i>Tolyteutes</i></b>           | KP096710                                                                                                                                     |                              |                     |                                              |
| <b><i>Choloepus hoffmanni</i></b>  | ABVD02328607<br>KP096711                                                                                                                     | ABVD02278694                 | ABVD02275907        | ABVD02265667                                 |
| <b><i>Choloepus didactylus</i></b> | KP096712                                                                                                                                     |                              |                     |                                              |
| <b><i>Bradypus</i></b>             | KP096713                                                                                                                                     |                              |                     |                                              |
| <b><i>Manis</i></b>                | JPTV01024353<br>JPTV01024354                                                                                                                 |                              | JPTV01007876        |                                              |
| <b><i>Balaenoptera</i></b>         | ATDI01012999<br>ATDI01013000<br>ATDI01013002<br>ATDI01013004<br>ATDI01013005<br>ATDI01013006<br>ATDI01013007                                 |                              | ATDI01106906        |                                              |
| <b><i>Physeter</i></b>             | AWZP01021317<br>AWZP01021318<br>AWZP01021320<br>AWZP01021321                                                                                 |                              | AWZP01022345        |                                              |

|                                    |                                                           |                              |                          |  |
|------------------------------------|-----------------------------------------------------------|------------------------------|--------------------------|--|
| <b><i>Tursiops</i></b>             | Ensembl77<br>ABRN02390512<br>ABRN02390513<br>ABRN02390518 |                              | Ensembl77                |  |
|                                    |                                                           |                              |                          |  |
|                                    | <b>SAG</b>                                                | <b>SLC24A2</b>               | <b>SWS1</b>              |  |
| <b><i>Dasyops</i></b>              | PreEnsembl77                                              | PreEnsembl77<br>AAGV03003191 | AAGV03126450             |  |
| <b><i>Chaephractus</i></b>         |                                                           |                              | KP096697                 |  |
| <b><i>Euphractus</i></b>           |                                                           |                              | KP096698                 |  |
| <b><i>Priodontes</i></b>           |                                                           |                              | KP096699                 |  |
| <b><i>Tolypeutes</i></b>           |                                                           |                              | KP096700                 |  |
| <b><i>Zaedyus</i></b>              |                                                           |                              | KP096701                 |  |
| <b><i>Choloepus hoffmanni</i></b>  | ABVD02329548                                              | ABVD02254892<br>ABVD02254894 | ABVD02055170<br>KP096702 |  |
| <b><i>Choloepus didactylus</i></b> |                                                           |                              | KP096703                 |  |
| <b><i>Bradypus</i></b>             |                                                           |                              | KP096704                 |  |
| <b><i>Myrmecophaga</i></b>         |                                                           |                              | KP096705                 |  |
| <b><i>Manis</i></b>                |                                                           |                              | JPTV01022983             |  |
